# Supplementary material for: Comparing Quantitative Methods for Analyzing Sediment DNA Records of Cyanobacteria in Experimental and Reference Lakes
Source: Frontiers journal article supplement (doi:10.3389/fmicb.2021.669910), 2021-06-18
Supplement: Image_1.PDF [file Image_1.PDF]

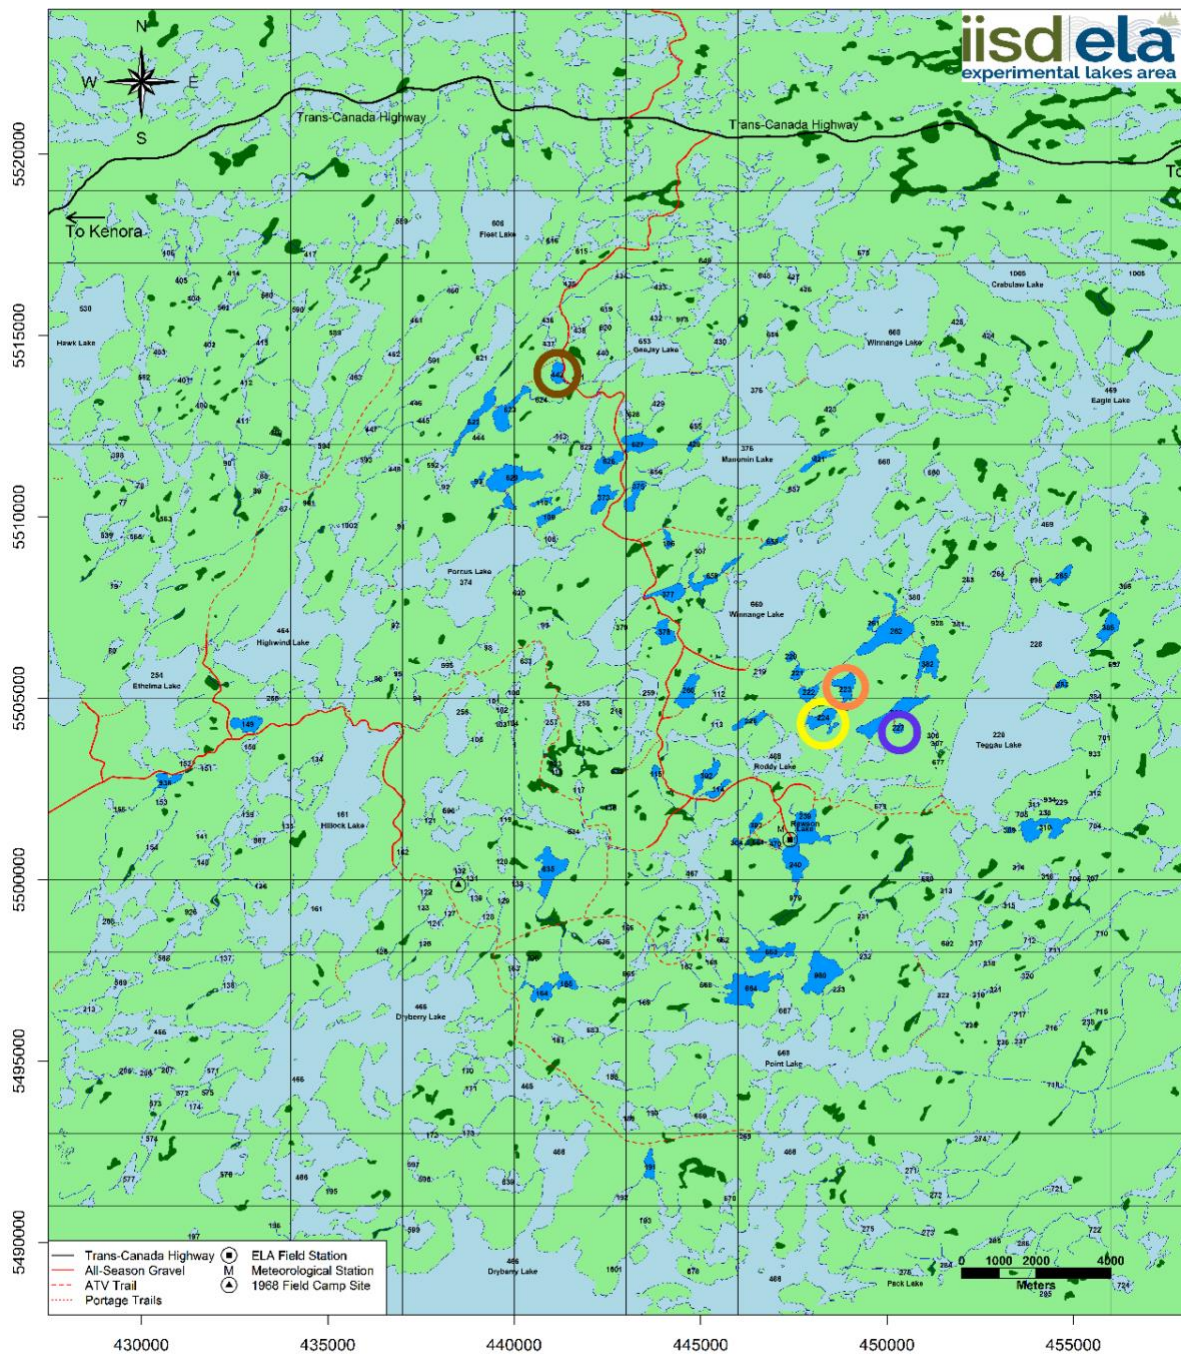

Figure S1. Map of the IISD Experimental Lakes Area. Circled sites correspond to study lakes 227 (purple), 223 (orange), 224 (yellow), and 442 (brown). Map from IISD Experimental Lakes Area ([iisd.org/ela](http://iisd.org/ela)).
